# Supplementary material for: Reliability of Self-Reported Height and Weight in Children: A School-Based Cross-Sectional Study and a Review
Source: MDPI journal article supplement (doi:10.3390/nu15010075), 2022-12-23
Supplement: s1 [file s1]

# Reliability of Self-Reported Height and Weight in Children: A School-Based Cross-Sectional Study and a Review

Supplementary Table S1. Questionnaire.

|                                                                                                                                                                                                                                                                            |
|----------------------------------------------------------------------------------------------------------------------------------------------------------------------------------------------------------------------------------------------------------------------------|
| <b>Child questionnaire</b>                                                                                                                                                                                                                                                 |
| <b>Outside of school, how many days per week do you do sports or a physical activity to the point of sweating or being out of breath ?</b><br>a) Never<br>b) A few times per month<br>c) 1–2 days per week<br>d) 3–4 days per week<br>e) 5–6 days per week<br>f) Every day |
| <b>During the week, how much time do you spend in front of a TV screen on average ?</b><br>a) Never<br>b) Less than 15 minutes per day<br>c) 15–30 minutes per day<br>d) 30–60 minutes per day<br>e) 1–2 hours per day<br>f) More than 2 hours per day                     |
| <b>Parent questionnaire</b>                                                                                                                                                                                                                                                |
| <b>What is the highest level of education that you have attained</b><br>a) Obligatory school<br>b) Apprenticeship<br>c) High school baccalaureate<br>d) University, college<br>e) Other                                                                                    |
| <b>Nationality</b><br>a) Swiss<br>b) Other                                                                                                                                                                                                                                 |
| <b>Anthropometric measures</b>                                                                                                                                                                                                                                             |
| <u>Before taking the measures, ask the child his weight : ..... (kg) and height ..... (cm).</u>                                                                                                                                                                            |
| <b>Measures : Child in light clothes or underwear, without shoes :</b><br><b>Weight (kg) :</b><br><b>Height (cm) :</b>                                                                                                                                                     |

**Supplementary Table S2. Overview of the studies identified and their key results.**

| Study ID            | Pearson's <i>r</i> Correlation |        |      | Mean Difference |             |                          | Prevalence Difference (%) |       |                      |
|---------------------|--------------------------------|--------|------|-----------------|-------------|--------------------------|---------------------------|-------|----------------------|
|                     | Weight                         | Height | BMI  | Weight (kg)     | Height (cm) | BMI (kg/m <sup>2</sup> ) | Overweight                | Obese | Overweight and obese |
| Aasvee 2015         | 0.95                           | 0.95   | 0.89 | −1.4            | −0.5        | −4.0                     |                           |       | −3.6                 |
| Abalkhail 2002      | 0.90                           | 0.72   |      | −2.7            | 4.0         |                          |                           |       |                      |
| Abraham 2004        |                                |        |      | −1.2            | −0.9        | −0.1                     |                           |       |                      |
| Ambrosi–Randic 2007 | 0.98                           | 0.97   | 0.95 | −0.7            | 0.2         |                          |                           |       |                      |
| Andersen 2005       |                                |        | 0.91 | −0.7            | 0.0         | −0.4                     |                           |       |                      |
| Bae 2010            |                                |        |      | −1.5            | 0.2         | −0.6                     |                           | −4.7  |                      |
| Baile 2014          | 0.95                           | 0.95   | 0.93 | −0.8            | 0.1         | −0.3                     | −2.2                      | −1.1  | −3.3                 |
| Beck 2012           | 0.89                           | 0.65   | 0.79 | −3.4            | −0.1        | −1.9                     |                           |       |                      |
| Beghin 2013         |                                |        |      | −0.8            | 0.7         |                          |                           |       |                      |
| Berg 2001           |                                |        |      | −0.4            | 0.3         | −0.2                     |                           |       |                      |
| Brault 2015         | 0.98                           | 0.92   | 0.90 | −1.0            | −0.8        | −0.2                     | −1.5                      | −0.1  | −1.6                 |
| Brener 2003         | 0.93                           | 0.90   | 0.89 | −3.5            | 2.7         | −2.6                     |                           |       | −11.1                |
| Brettschneider 2015 |                                |        |      | −0.7            | 0.3         | −0.3                     | −1.3                      | −1.3  | −2.6                 |
| Brooks–Gunn 1987    | 0.98                           | 0.75   |      | −1.2            | 1.4         |                          |                           |       |                      |
| Buttenheim 2013     |                                |        |      |                 |             | −1.2                     | 1.0                       | −9.0  | −8.0                 |
| Chan 2013           |                                |        |      | −0.6            | −0.2        | −0.2                     |                           |       |                      |
| Charalampos 2009    | 0.94                           | 0.86   | 0.89 | −0.7            | 1.3         | −0.6                     | −3.3                      | −1.0  |                      |
| Chau 2013           | 0.98                           | 0.96   | 0.93 | −0.9            | −0.4        | −0.3                     | −2.1                      | −1.3  |                      |
| Clarke 2014         |                                |        |      | −0.6            |             |                          |                           |       |                      |
| Dalton 2014         |                                |        |      |                 |             |                          |                           |       | 4.6                  |
| Davis 1994          | 0.94                           | 0.86   | 0.86 |                 |             |                          |                           |       |                      |
| De Vriendt 2009     |                                |        |      | −0.7            | −0.1        | −0.2                     | −2.0                      | −0.8  |                      |
| Domingues 2011      |                                |        | 0.84 |                 |             |                          | −3.7                      | −1.9  |                      |
| Drake 2013          |                                |        |      |                 |             |                          |                           | −6.2  | −4.9                 |
| Ekström 2015        |                                |        |      | −1.1            | 0.5         | −0.5                     | 0.0                       | 0.0   |                      |
| Elgar 2005          | 0.95                           | 0.82   | 0.88 | −0.5            | 0.4         | −0.3                     | −4.8                      | −1.6  |                      |
| Enes 2009           |                                |        |      | −1.0            | −2.5        | 0.1                      |                           |       |                      |
| Farre Rovira 2002   |                                |        |      |                 |             | −0.9                     |                           |       |                      |
| Fonseca 2010        | 0.96                           | 0.89   | 0.85 | −1.0            | 0.7         | −0.6                     | −0.5                      | −1.1  |                      |
| Fortenberry 1992    |                                |        |      | −1.4            | 0.5         |                          |                           |       | −0.3                 |
| Frayon 2017         |                                |        |      | −3.3            | −2.9        | −0.4                     |                           |       |                      |

| Study ID            | Pearson's <i>r</i> Correlation |        |      | Mean Difference |             |                          | Prevalence Difference (%) |       |                      |
|---------------------|--------------------------------|--------|------|-----------------|-------------|--------------------------|---------------------------|-------|----------------------|
|                     | Weight                         | Height | BMI  | Weight (kg)     | Height (cm) | BMI (kg/m <sup>2</sup> ) | Overweight                | Obese | Overweight and obese |
| Ghosh–Dastidar 2016 |                                |        |      | −1.9            | −0.9        | −0.5                     | −2.1                      | −2.1  | −4.2                 |
| Giacchi 1998        | 0.94                           | 0.95   |      | −1.8            | 1.4         | −1.0                     | −7.5                      |       |                      |
| Goodman 2000        | 0.95                           | 0.94   | 0.92 | −0.6            |             | −0.1                     |                           | −1.6  |                      |
| Hauck 1995          | 0.93                           | 0.73   | 0.84 | −1.8            | 1.0         |                          |                           |       | −6.0                 |
| Himes 1992          | 0.94                           | 0.83   | 0.86 | −2.7            | 0.5         | −1.1                     |                           |       |                      |
| Himes 2001          |                                |        |      | −0.9            | −1.1        | 0.0                      |                           |       |                      |
| Himes 2005          | 0.95                           | 0.85   | 0.87 | −2.7            | 1.8         | −2.3                     |                           |       |                      |
| Jansen 2006         | 0.85                           | 0.80   | 0.75 | −6.1            | −1.5        | −1.5                     |                           |       |                      |
| Jayawardene 2014    |                                |        |      | −1.0            | 1.1         | −0.7                     | −0.2                      | −4.1  | −4.3                 |
| Kee 2017            |                                |        |      | −1.6            | −1.2        | −0.4                     | 0.3                       | −1.0  |                      |
| Kurth 2010          |                                |        |      | −0.7            | 0.4         | −0.4                     |                           |       |                      |
| Lee 2006            | 0.83                           | 0.52   | 0.61 | −4.1            | −4.1        | 0.7                      |                           |       |                      |
| Lee 2013            | 0.97                           | 0.96   | 0.93 | −0.4            | 0.8         |                          |                           |       | −4.5                 |
| Legleye 2014        |                                |        | 0.87 | −1.6            | 1.3         | −0.9                     | −6.7                      | −1.7  |                      |
| Linhart 2010        |                                |        |      | −0.1            |             | −0.1                     | 0.1                       | −2.3  |                      |
| Morrissey 2006      | 0.96                           | 0.91   | 0.92 | −1.5            | −0.2        | −0.4                     |                           |       | −2.7                 |
| Ohlmer 2012         |                                |        |      | −0.5            | −1.0        |                          |                           |       |                      |
| Perez 2015          | 0.94                           | 0.82   | 0.88 | −0.7            | −0.6        | −0.4                     |                           |       |                      |
| Rasmussen 2007      | 0.95                           | 0.95   | 0.93 | −0.8            | 0.1         | −0.3                     | −2.2                      | −1.1  | −3.3                 |
| Rasmussen 2013      |                                |        |      | −1.3            | 0.2         |                          |                           |       | −5.7                 |
| Robinson 2014       | 0.88                           | 0.32   |      | −3.1            | 1.9         |                          |                           |       | −1.1                 |
| Rodrigues 2013      |                                |        |      | −0.4            | 0.0         | −0.1                     |                           |       |                      |
| Seghers 2010        |                                |        |      |                 |             |                          | −2.2                      | −1.4  |                      |
| Stefan 2019         | 0.97                           | 0.96   | 0.95 | −0.8            | 0.8         | −0.5                     |                           |       |                      |
| Strauss 1999        | 0.93                           | 0.89   | 0.87 | −0.4            | −1.0        |                          |                           |       |                      |
| Tienboon 1992       | 0.87                           | 0.77   | 0.67 | −0.8            | 0.4         | −0.4                     |                           |       |                      |
| Tokmakidis 2007     | 0.96                           | 0.91   | 0.90 | −2.1            | 1.4         | −1.2                     | −5.7                      | −5.2  |                      |
| Tsigilis 2006       | 0.95                           | 0.97   | 0.92 | −2.1            | 0.5         | −0.9                     |                           |       |                      |
| Wang 2002           |                                |        |      | −2.0            | 1.1         |                          | −13.2                     | −2.1  | −7.0                 |
| Yoshitake 2012      | 0.98                           | 0.95   | 0.94 | −0.2            | −0.4        | 0.0                      |                           |       |                      |
| Zhou 2010           | 0.91                           | 0.94   | 0.81 | −2.3            | −1.4        | 1.2                      |                           |       | −5.1                 |
| Current study       | 0.96                           | 0.92   | 0.88 | −1.4            | −0.9        | −0.4                     |                           |       | −1.9                 |
